# Supplementary material for: Design, optimization and validation of genes commonly used in expression studies on DMH/AOM rat colon carcinogenesis model
Source: PubMed Central journal article supplement (PMC6357868; doi:10.7717/peerj.6372), 2019-01-29
Supplement: peerj-07-6372-s002.pdf [file peerj-07-6372-s002.pdf]

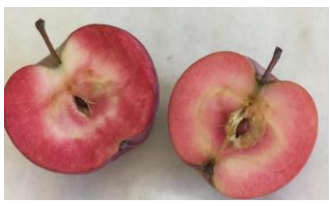

# LleidaAppleRat Study (LLARS)

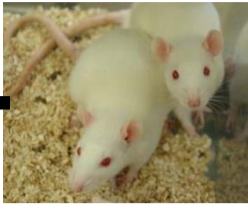

60 male Wistar rats were separated randomly in different cages (each cage containing two rodents)

Legend:

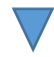

Saline solution (0.9%) i.p. injection. Dose: 15 mg/kg

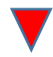

Azoxymethane i.p. injection. Dose: 15 mg/kg

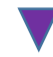

Fluorouracil i.p. injection. Dose: 12 and 6 mg/kg (4 doses each)

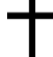

Sacrifice (n=5)

Negative control (n=10)

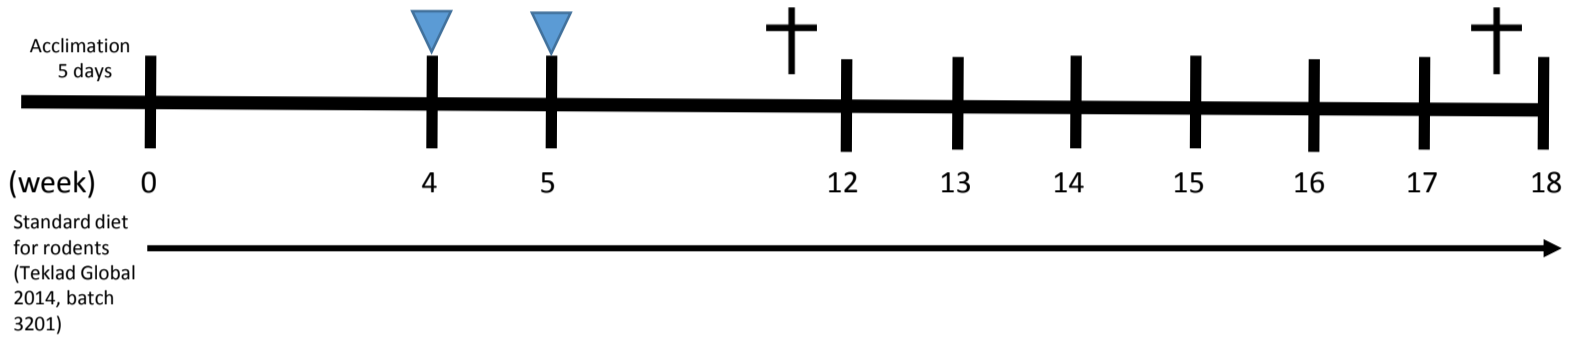

Positive control (n=10)

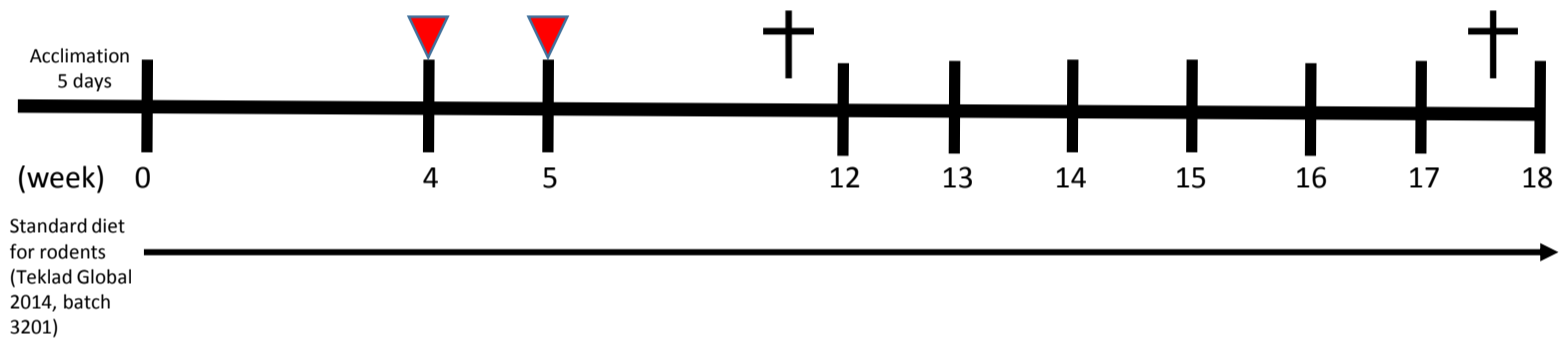

5-Fluorouracil group (n=10)

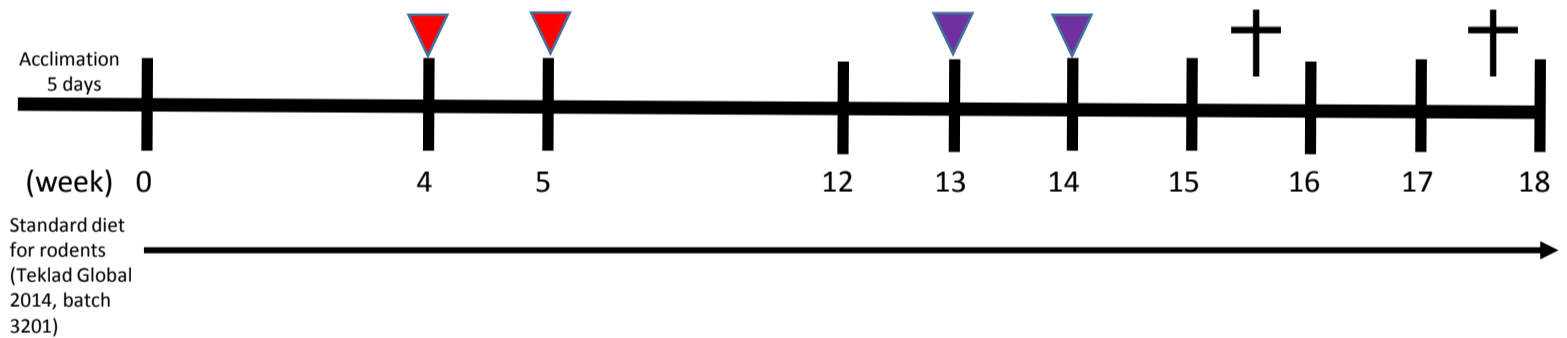

White Flesh group (n=10)

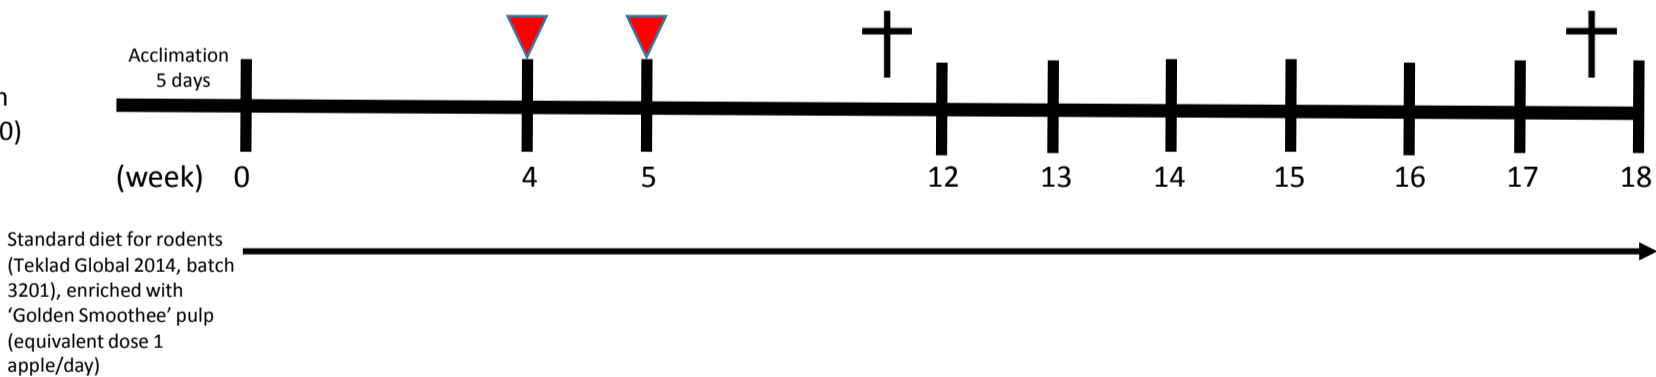

Red Flesh group (n=10)

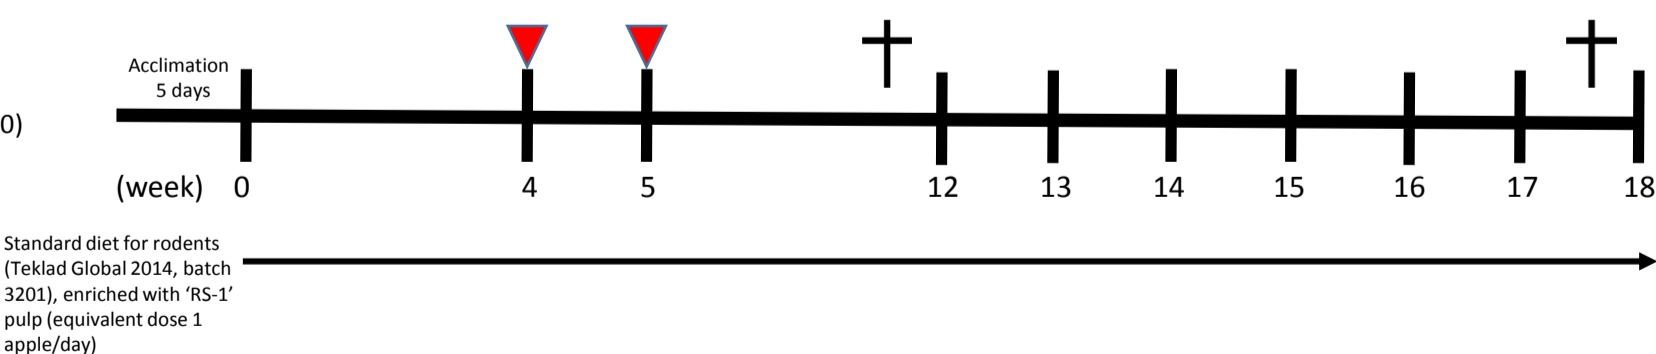

Cyanidin Galactoside group (n=10)

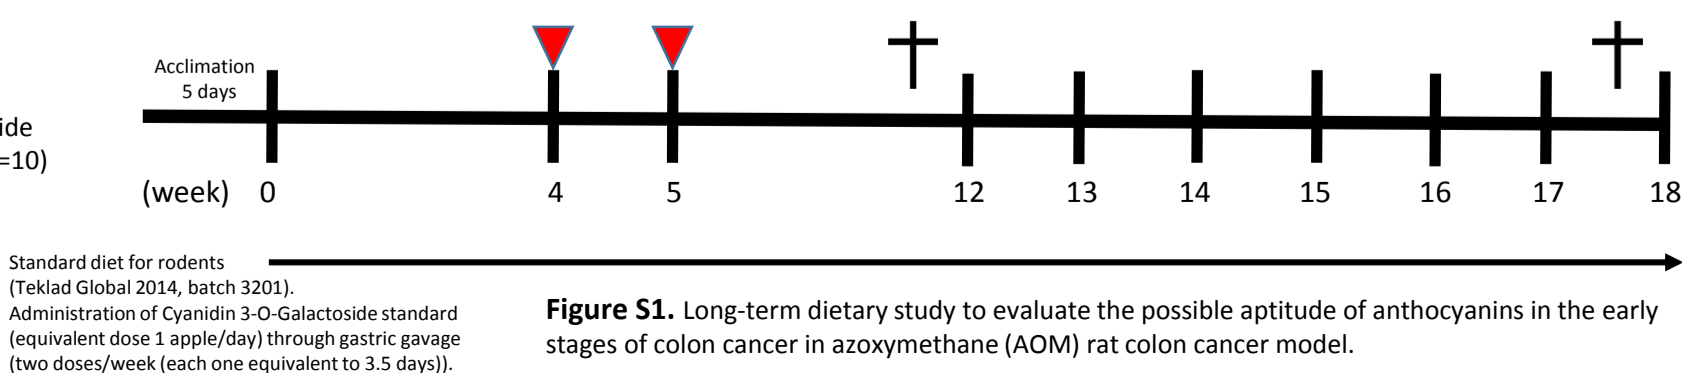

**Figure S1.** Long-term dietary study to evaluate the possible aptitude of anthocyanins in the early stages of colon cancer in azoxymethane (AOM) rat colon cancer model.
