# Supplementary material for: Design, optimization and validation of genes commonly used in expression studies on DMH/AOM rat colon carcinogenesis model
Source: PubMed Central journal article supplement (PMC6357868; doi:10.7717/peerj.6372), 2019-01-29
Supplement: peerj-07-6372-s003.pdf [file peerj-07-6372-s003.pdf]

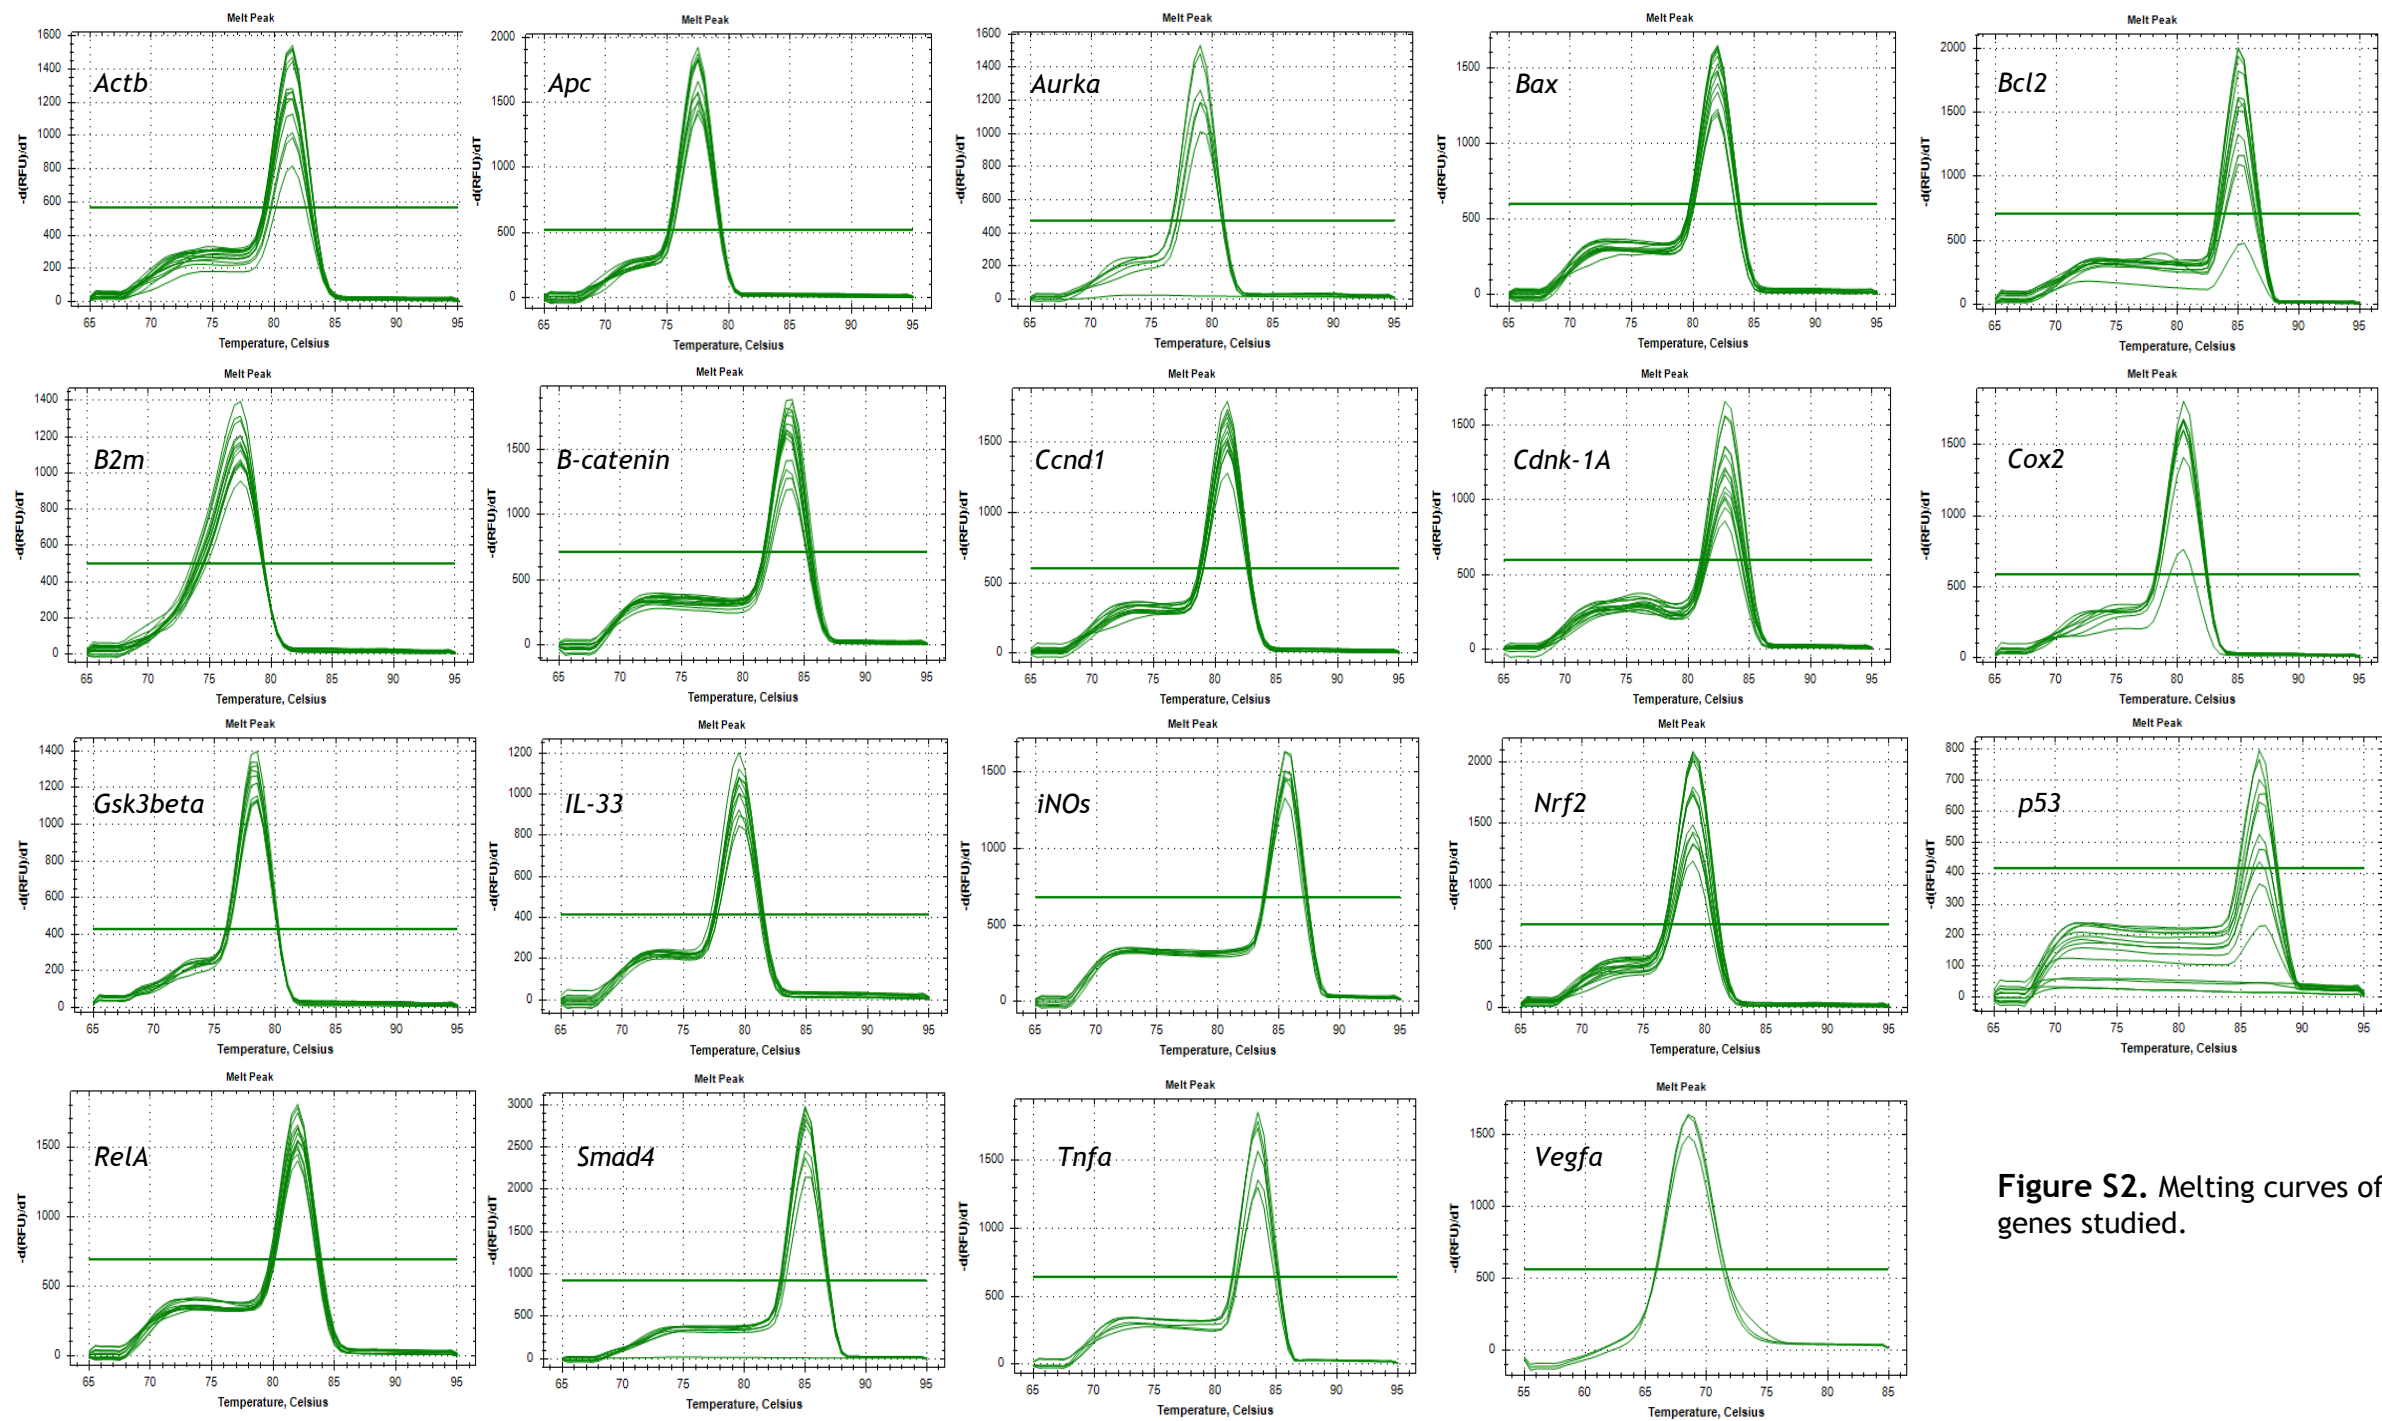

**Figure S2.** Melting curves of all genes studied.
