# Supplementary material for: Design, optimization and validation of genes commonly used in expression studies on DMH/AOM rat colon carcinogenesis model
Source: PubMed Central journal article supplement (PMC6357868; doi:10.7717/peerj.6372), 2019-01-29
Supplement: peerj-07-6372-s007.pdf [file peerj-07-6372-s007.pdf]

# PDF S3

## Reference gene validation (pilot scale):

|          | 1        | 2        | 3        | 4        | 5        | 6        | 7        | 8        | 9        | 10       | 11       | 12       |
|----------|----------|----------|----------|----------|----------|----------|----------|----------|----------|----------|----------|----------|
| <b>A</b> | C-1, A.1 | C-1, A.2 | C-1, A.3 | C-2, B.1 | C-2, B.2 | C-2, B.3 | C+1, C.1 | C+1, C.2 | C+1, C.3 | C+2, D.1 | C+2, D.2 | C+2, D.3 |
| <b>B</b> | FU1, E.1 | FU1, E.2 | FU1, E.3 | FU2, F.1 | FU2, F.2 | FU2, F.3 | WF1, G.1 | WF1, G.2 | WF1, G.3 | WF2, H.1 | WF2, H.2 | WF2, H.3 |
| <b>C</b> | RF1, I.1 | RF1, I.2 | RF1, I.3 | RF4, J.1 | RF4, J.2 | RF4, J.3 | AE1, K.1 | AE1, K.2 | AE1, K.3 | AE2, L.1 | AE2, L.2 | NTC      |
| <b>D</b> |          |          |          |          |          |          |          |          |          |          |          |          |
| <b>E</b> |          |          |          |          |          |          |          |          |          |          |          |          |
| <b>F</b> | C-1, A.1 | C-1, A.2 | C-1, A.3 | C-2, B.1 | C-2, B.2 | C-2, B.3 | C+1, C.1 | C+1, C.2 | C+1, C.3 | C+2, D.1 | C+2, D.2 | C+2, D.3 |
| <b>G</b> | FU1, E.1 | FU1, E.2 | FU1, E.3 | FU2, F.1 | FU2, F.2 | FU2, F.3 | WF1, G.1 | WF1, G.2 | WF1, G.3 | WF2, H.1 | WF2, H.2 | WF2, H.3 |
| <b>H</b> | RF1, I.1 | RF1, I.2 | RF1, I.3 | RF4, J.1 | RF4, J.2 | RF4, J.3 | AE1, K.1 | AE1, K.2 | AE1, K.3 | AE2, L.1 | AE2, L.2 | NTC      |

Actb gene

B2m gene

**Figure 1.** Distal colon samples from different rats from different treatments (see Fig. S1) analysed.

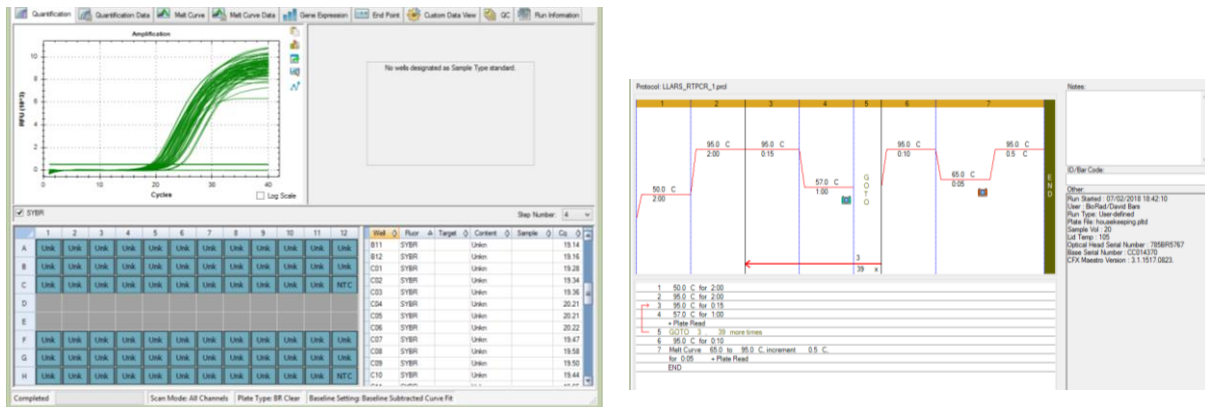

**Figure 2.** Output of the results obtained once analysed through Bio-Rad CFX96 real-time PCR system.

Two software resources have been used to decide if one of the two reference assayed within different experimental conditions are better or not.

## Tool 1)

### GeNorm algorithm

Bio-Rad CFX Maestro 1.1. software has a tool (based on geNorm algorithm) to check the stability (aptitude) of the candidate reference genes.

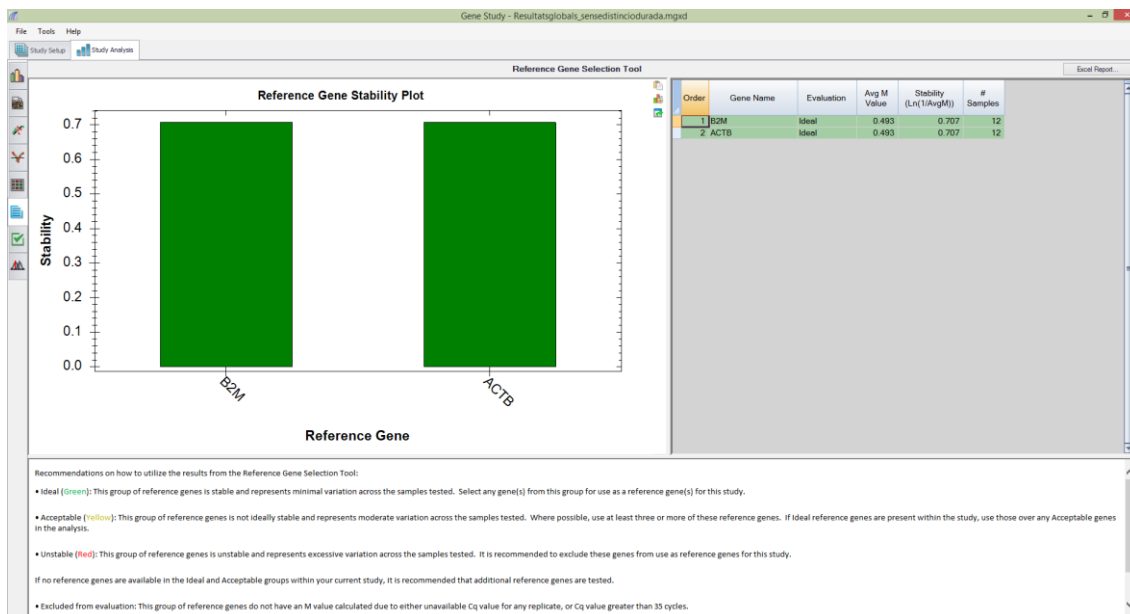

**Figure 3.** Output results of Bio-Rad CFX Maestro 1.1. software.

Both of them are stable along the treatments studied. Therefore, both are good candidates.

## Tool 2)

### Web-based RefFinder platform

<http://150.216.56.64/referencegene.php?type=reference>

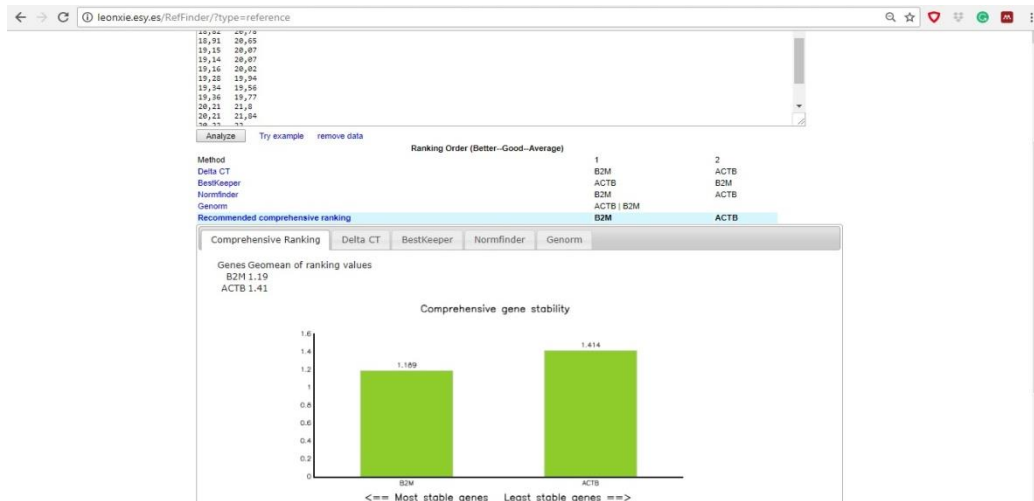

**Figure 4.** Output results of RefFinder platform.

RefFinder recommended us *B2M* gene instead of *Actb* gene by minor differences in geomean of ranking values, as it can be seen in the screenshot.
